# Supplementary material for: Genetic grouping of SARS-CoV-2 coronavirus sequences using informative subtype markers for pandemic spread visualization
Source: PubMed Central journal article supplement (PMC7523987; doi:10.1371/journal.pcbi.1008269), 2020-09-17

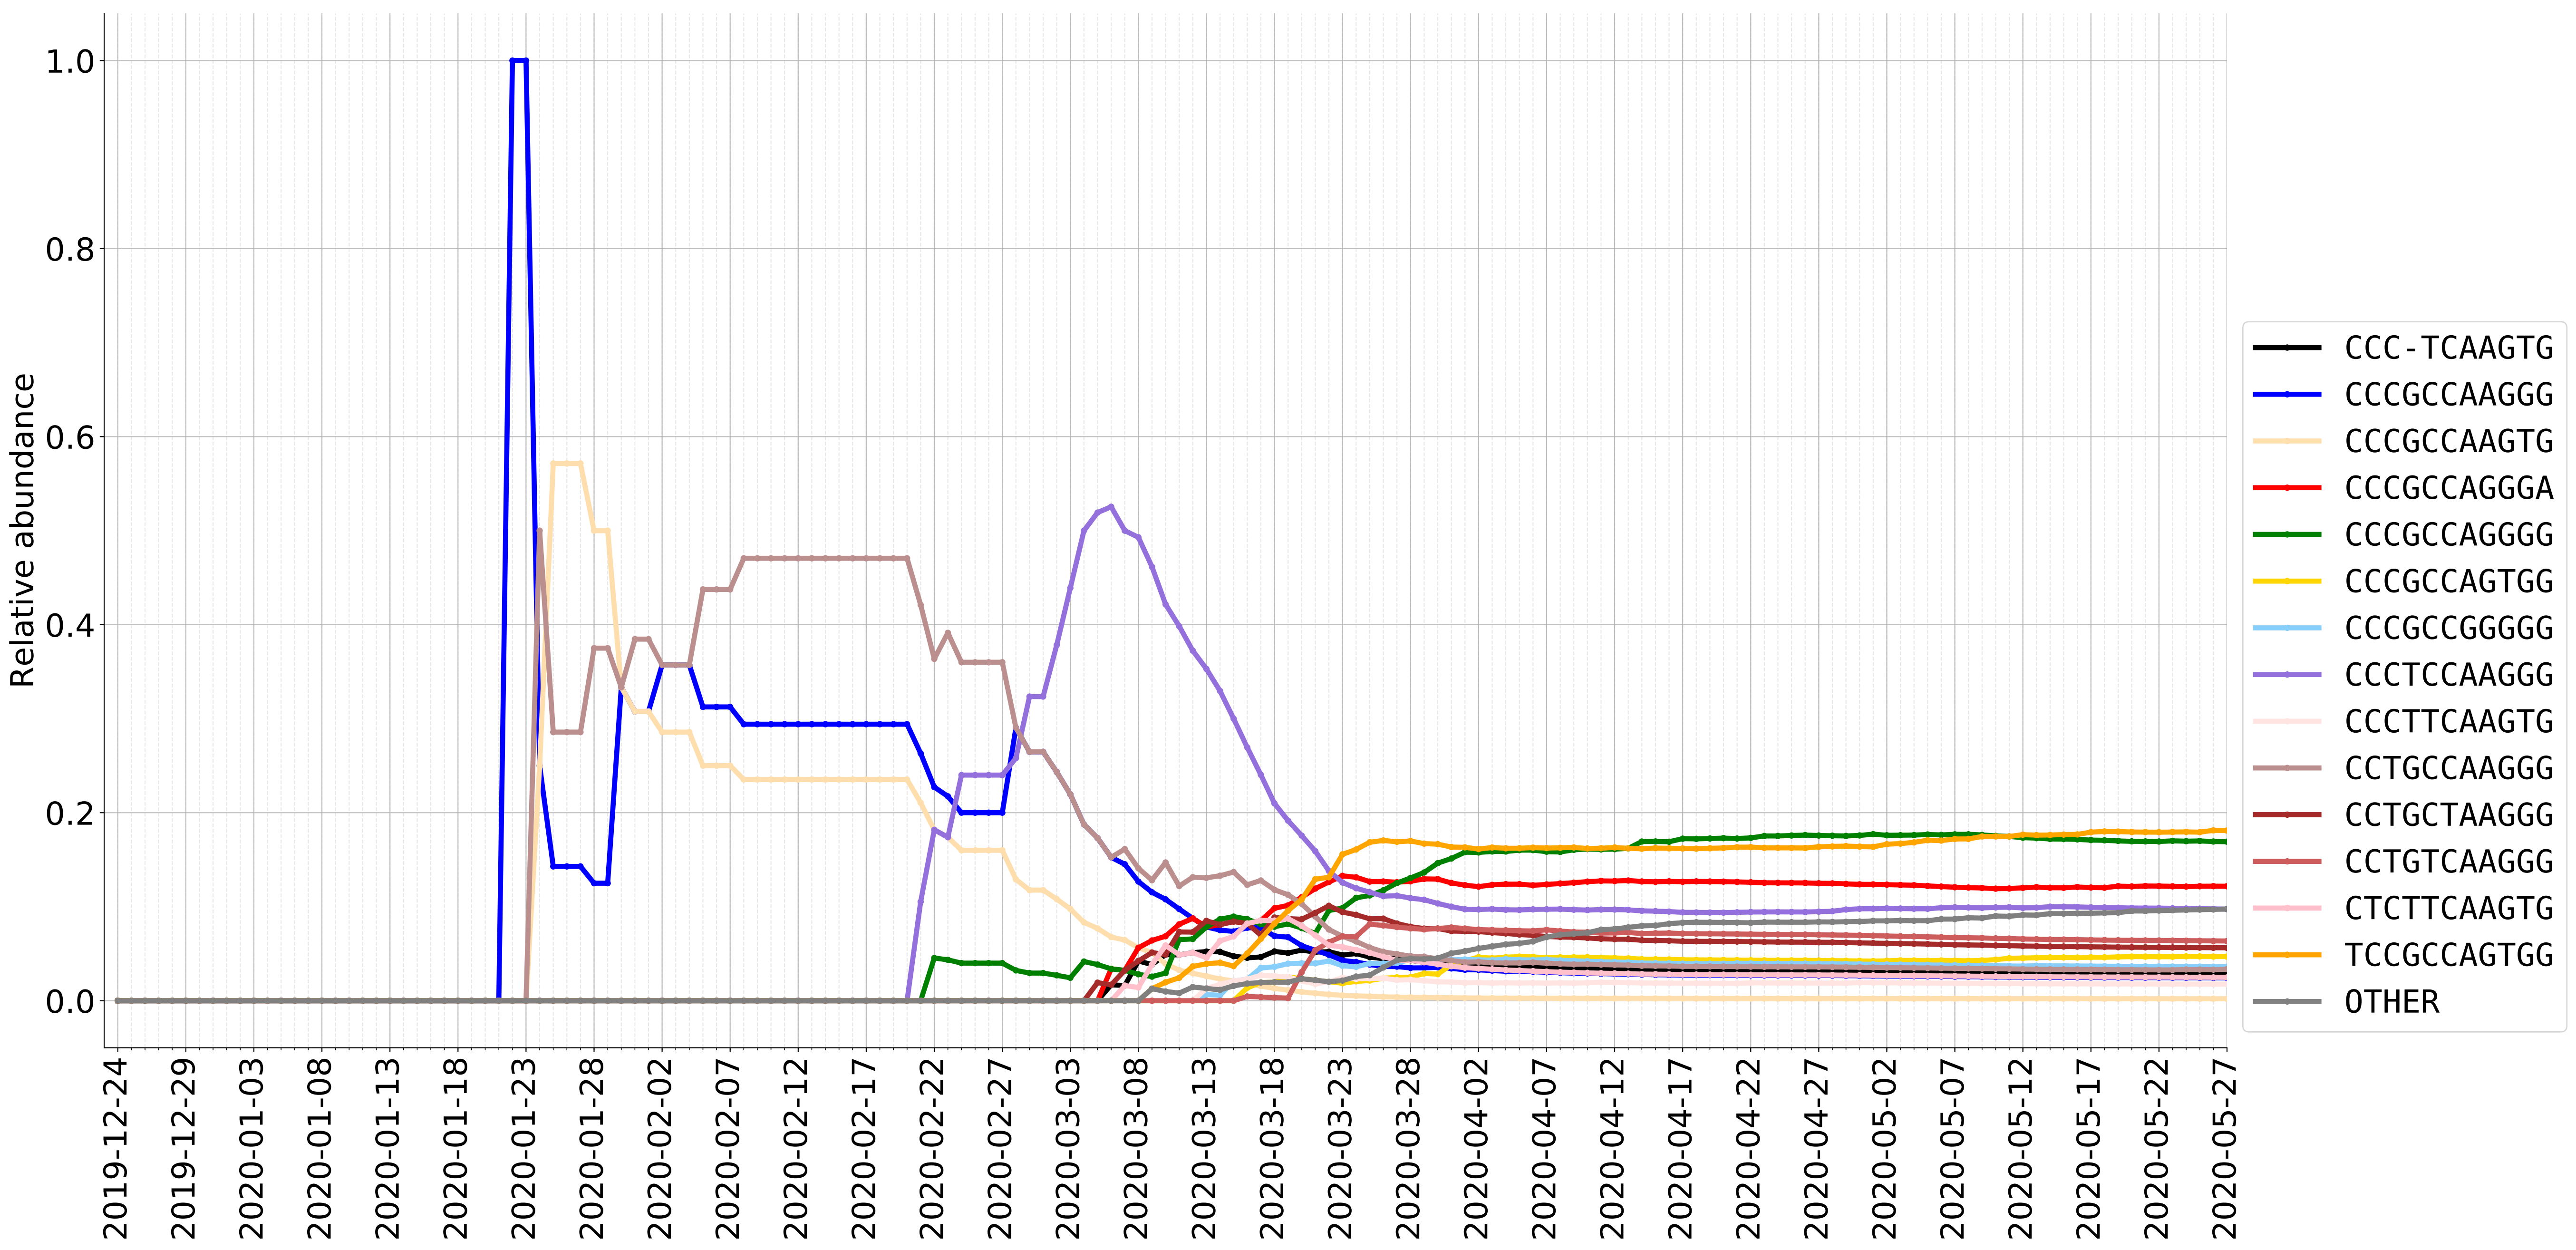

Supplement: pcbi.1008269.s003.pdf [file pcbi.1008269.s003.pdf]
