# Supplementary material for: Genetic grouping of SARS-CoV-2 coronavirus sequences using informative subtype markers for pandemic spread visualization
Source: PubMed Central journal article supplement (PMC7523987; doi:10.1371/journal.pcbi.1008269), 2020-09-17
Supplement: pcbi.1008269.s012.pdf [file pcbi.1008269.s012.pdf]

# Visualizations of original ISMs

Zhengqiao Zhao<sup>1\*</sup>, Bahrad A. Sokhansanj<sup>1†</sup>, Charvi Malhotra<sup>2</sup>, Kitty Zheng<sup>2</sup>, Gail L. Rosen<sup>1+</sup>,

**1 Ecological and Evolutionary Signal-Processing and Informatics Laboratory, Department of Electrical and Computer Engineering, College of Engineering, Drexel University, Philadelphia, PA, USA**  
**2 College of Medicine, Drexel University, Philadelphia, PA, USA**

\* zz374@drexel.edu  
 † bahrad@molhealtheng.com  
 + glr26@drexel.edu

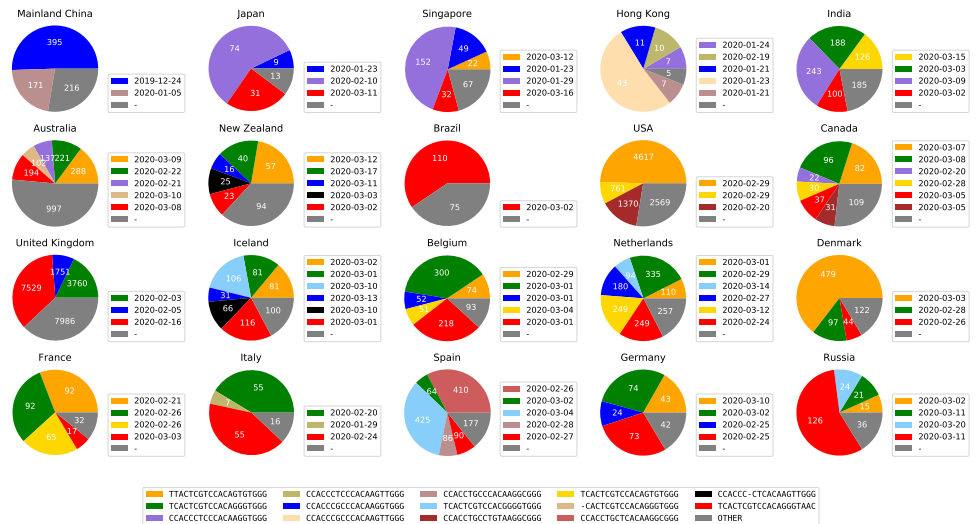

**Figure A** Major subtypes in countries/regions with the most sequences (indicating date subtype was first sequenced in that country/region). Subtypes with less than 5% abundance are plotted as “OTHER”. The raw counts for all ISMs in each country/region, as well as the date each ISM was first found in a sequence in that country/region

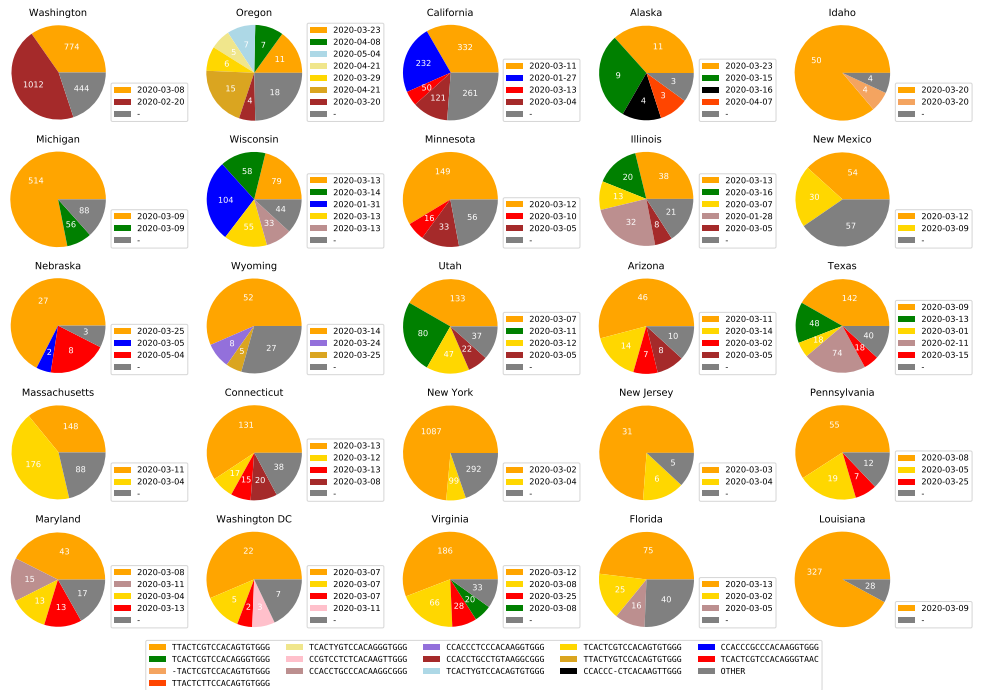

**Figure B** Viral subtype distribution in the United States, showing the 25 states with the most sequence submissions. Subtypes with less than 5% abundance are plotted as Other. The raw counts for all ISMs in each state, as well as the date each ISM was first found in a sequence in that state

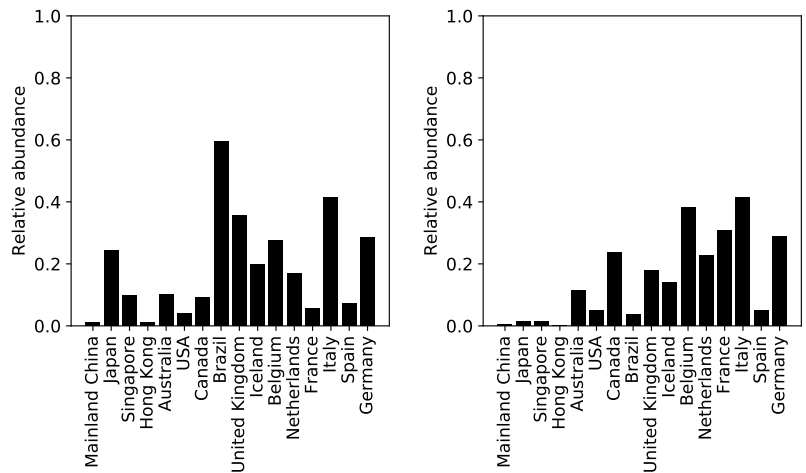

**Figure C** Relative abundance in other countries of the second-most abundant subtype in Italy, TCACTCGTCCACAGGGTAAAC (left) and most abundant subtype in Italy TCACTCGTCCACAGGGTGGG (right).

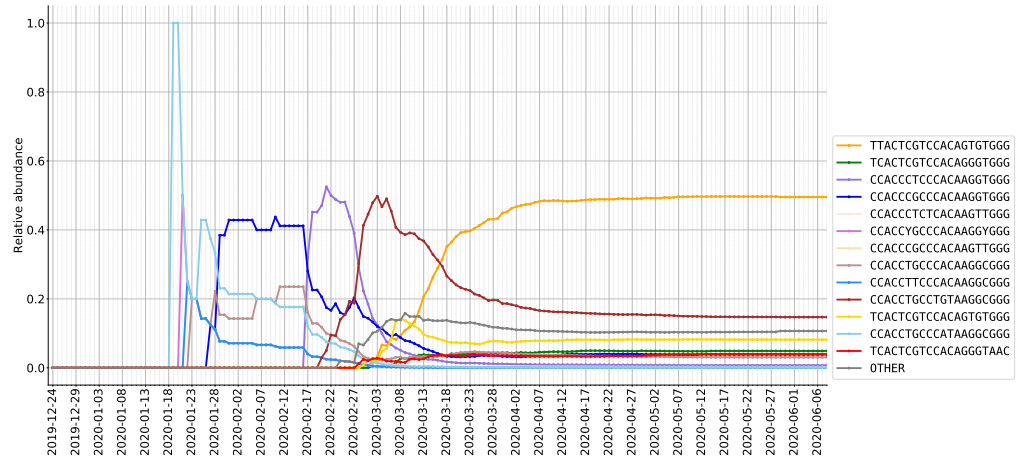

**Figure D** Relative abundance (%) of ISMs in DNA sequences from USA as sampled over time.

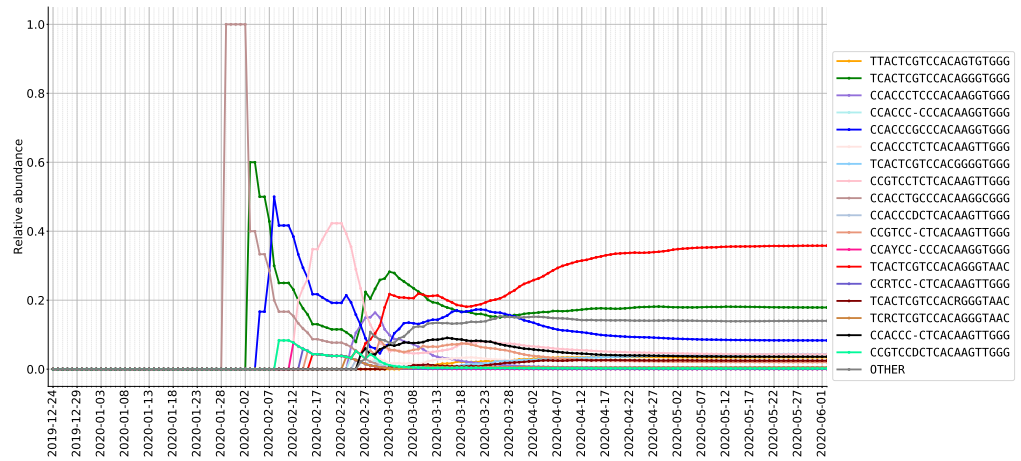

**Figure E** Relative abundance (%) of ISMs in DNA sequences from USA as sampled over time.

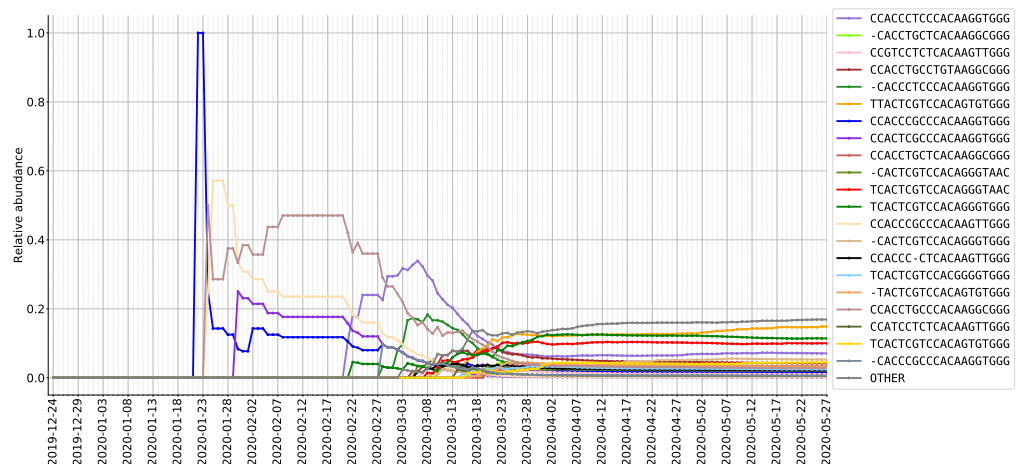

**Figure F** Relative abundance (%) of ISMs in DNA sequences from Australia as sampled over time.

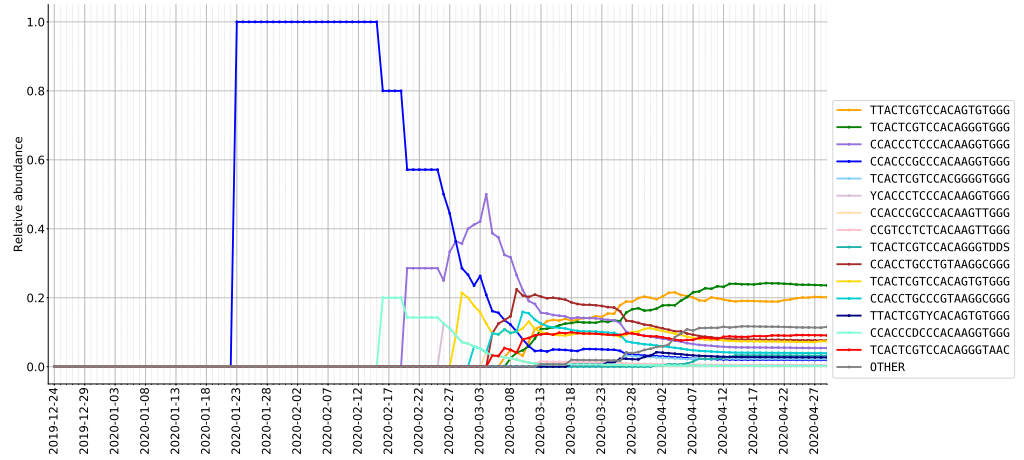

**Figure G** Relative abundance (%) of ISMs in DNA sequences from Canada as sampled over time.

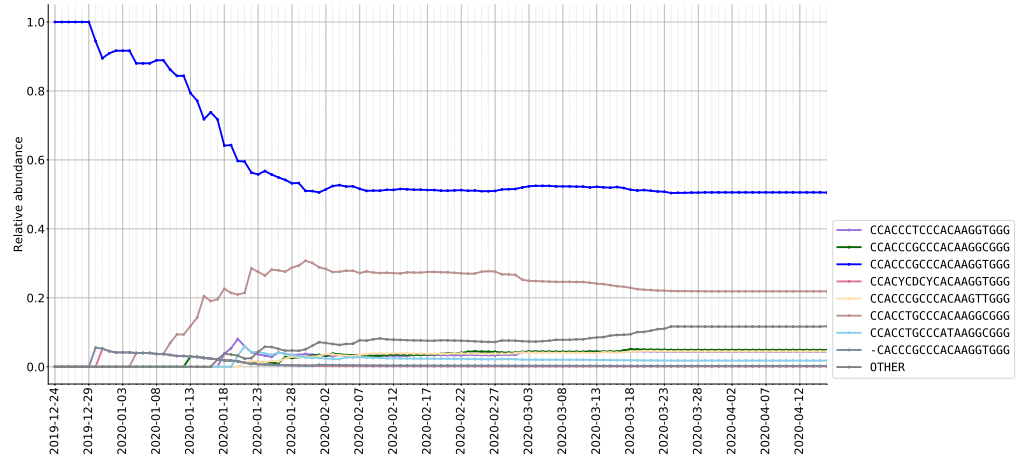

**Figure H** Relative abundance (%) of ISMs in DNA sequences from Mainland China as sampled over time.

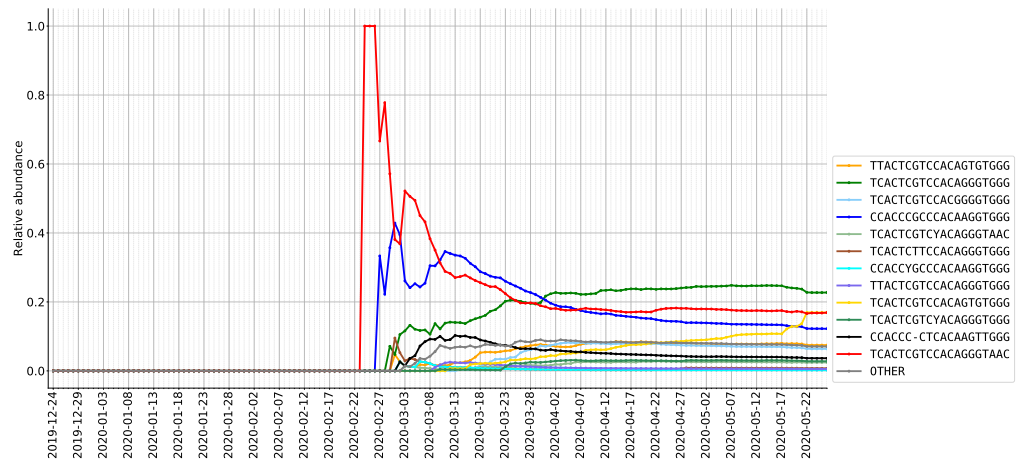

**Figure I** Relative abundance (%) of ISMs in DNA sequences from Netherlands as sampled over time.

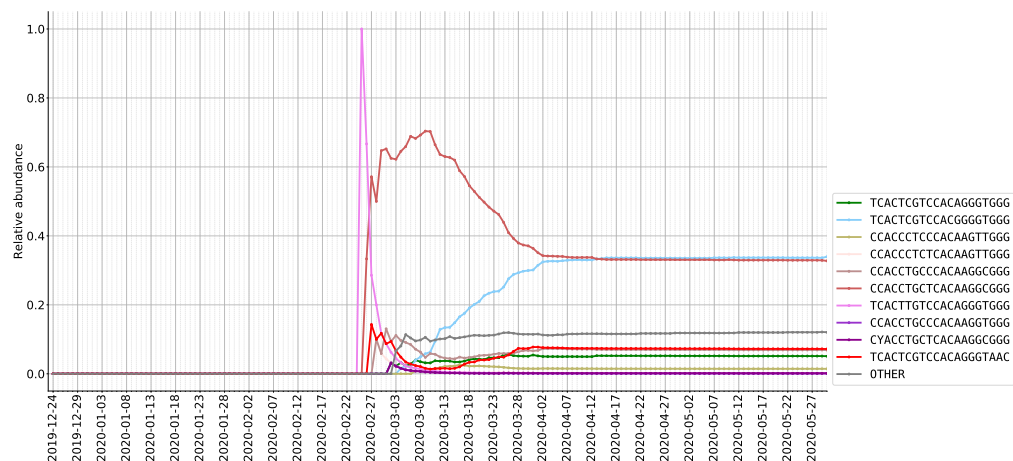

**Figure G** Relative abundance (%) of ISMs in DNA sequences from Spain as sampled over time.
